# Supplementary material for: Enhanced photocatalytic performance of anatase titania nanotubes via the synergistic effect of trace copper doping and oxygen vacancies
Source: Royal Society of Chemistry journal article supplement (doi:10.1039/d3nj00848g), 2023-01-01
Supplement: d3nj00848g5.pdf [file d3nj00848g5.pdf]

1  
2  
3  
4  
5  
6  
7  
8  
9  
10  
11  
12  
13

## Supplementary Information

### **Enhanced photocatalytic performance of titania nanotubes via the synergistic effect of trace copper doping and oxygen vacancies**

*Chenguang Wang, Lijun Chen, Guanwen Su, Wanping He, Lin Hao\*, Hongyuan Wei*

*School of Chemical Engineering and Technology, Tianjin University, Tianjin 300072, P. R. China*

**\*Corresponding author:**

**Lin Hao.** E-mail addresses: [haolin@tju.edu.cn](mailto:haolin@tju.edu.cn), Tel/Fax: +86 13820861786,

## 14 **1. Characterization methods**

15 The crystal structure and phase composition of the samples were obtained by  
16 powder X-ray diffraction (XRD, Smartlab, Rigaku, Japan). A field emission scanning  
17 electron microscope (FESEM, Apreo S LoVac, FEI, USA) was used to obtain the  
18 morphology of the samples, and a field emission transmission electron microscope  
19 (FETEM, JEM-2100F, JOEL, Japan) was used to further obtain the microstructure of  
20 the samples. The element distribution was obtained by transmission electron  
21 microscope (TEM, JEM-F200, JOEL, Japan) equipped with energy dispersive  
22 spectrometer (EDS). The surface electronic states of the samples were characterized by  
23 X-ray photoelectron spectroscopy (XPS, K-alpha XPS spectrometer, Thermo Fisher  
24 Scientific, USA). The specific surface area and pore size distribution of the catalyst  
25 samples were analyzed using BET (ASAP2460, Micromeritics, USA). UV-Vis  
26 spectrophotometer (UV-Vis DRS, Hitachi U4150, Japan) was used to obtain diffuse  
27 reflectance spectra of the samples. Electron paramagnetic resonance (EPR, Bruker  
28 EMX PLUS, Germany) was used to study the oxygen vacancy content of the sample  
29 and the species of free radicals generated under light, and the photoluminescence  
30 spectrum (PL) of the sample was obtained on a fluorescence spectrometer (FLS1000,  
31 Edinburgh, UK).

## 32 **2. Photocatalytic experiment**

33 Photocatalytic experiments were carried out under the illumination of a 300W Xe  
34 lamp (PLS-SXE300, Perfectlight, China) at room temperature. In a typical procedure,  
35 50 mg of the photocatalyst was added to 200 mL of RhB aqueous solution (50 mg/L),  
36 followed by sonication for 30 min to disperse the photocatalyst evenly in the solution,

37 and stirred for another 30 min in the dark to ensure the establishment of an  
38 adsorption/desorption equilibrium between the catalyst and the contaminants. At  
39 regular intervals, take 5ml samples, filter them with a 0.22 um polytetrafluoroethylene  
40 filter, measure the absorbance of the filtrate with a UV-Vis spectrophotometer at the  
41 maximum absorption wavelength of 555nm, and calculate the concentration of  
42 pollutants.

43

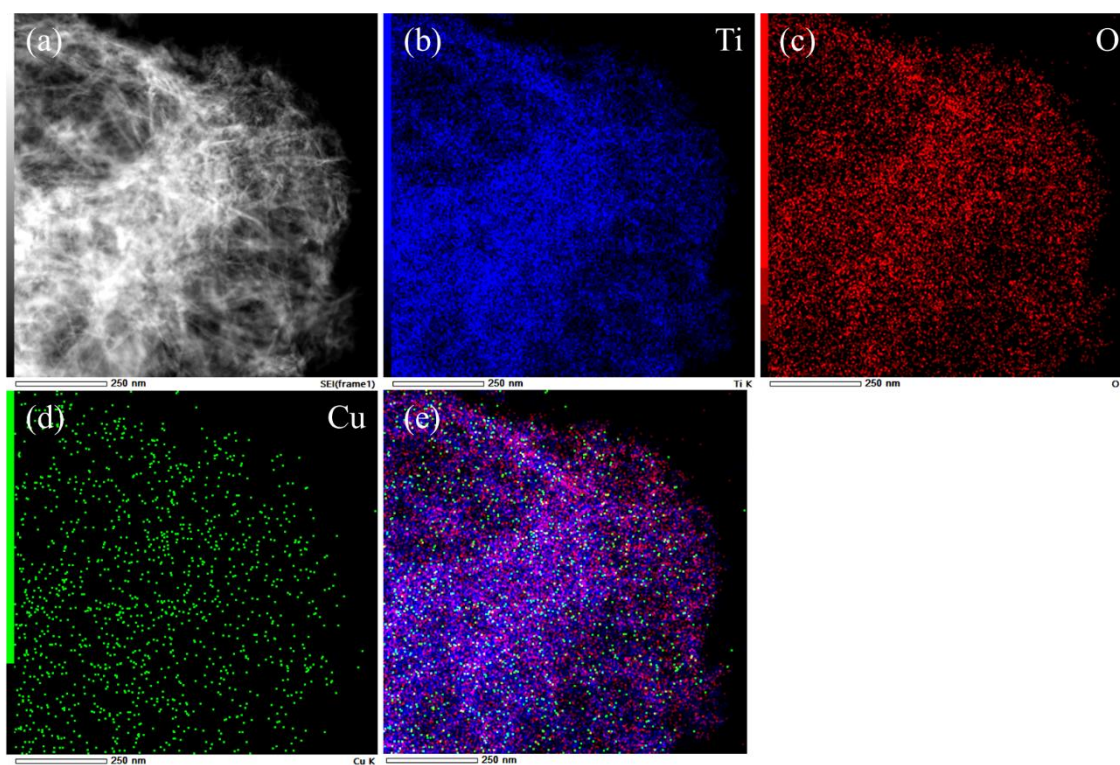

44

45

46

47

48

**Fig. S1.** EDS Mapping of Cu@ANTs.

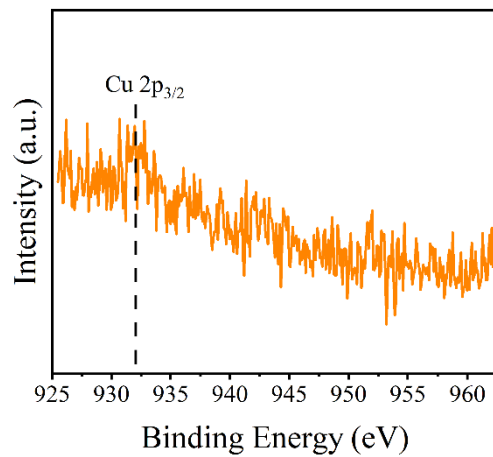

49  
50  
51  
52

**Fig. S2.** The fine XPS spectra of Cu 2p.

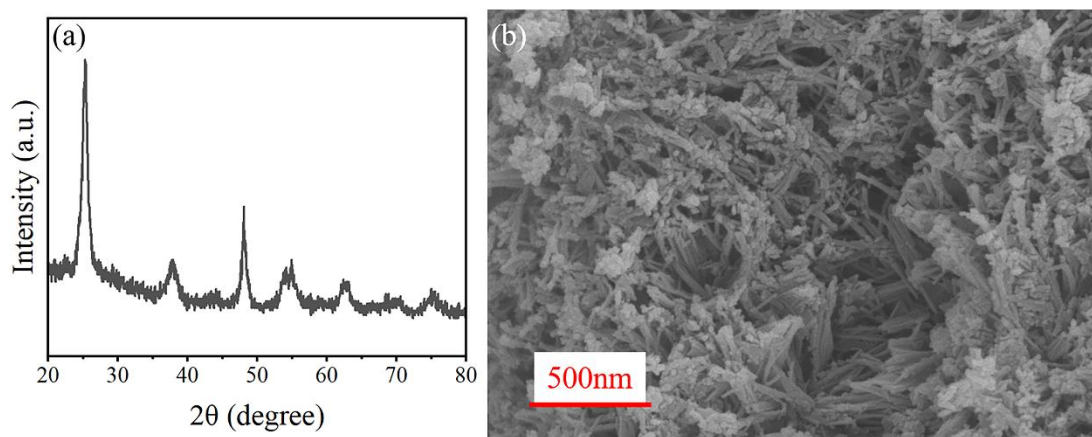

53  
54  
55  
56

**Fig. S3.** (a) The XRD pattern and (b) SEM image of samples after fifth cycling.

**Table S1.** Performance comparison of Cu doped TiO<sub>2</sub> photocatalyst in present work and previous works.

| Photocatalyst                             | Light source                 | Pollutant species | pollutant concentration (mg/L) | Catalyst dosage (g/L) | Degradation rate (%) | Irradiation time (min) | Rate constant (min <sup>-1</sup> ) | Ref. |
|-------------------------------------------|------------------------------|-------------------|--------------------------------|-----------------------|----------------------|------------------------|------------------------------------|------|
| Cu-TiO <sub>2</sub> nanoparticles         | White LED 50 kW              | Rhodamine B       | 5                              | 1                     | 97.12                | 120                    | 0.0147                             | 1    |
| Cu-TiO <sub>2</sub> Hollow nanostructures | LED lamp 70W                 | phenol            | 5                              | 0.6                   | 99                   | 240                    | 0.0216                             | 2    |
| Cu-TiO <sub>2</sub> nanofibers            | UV-A lamps 8W                | methyl orange     | 10                             | 0.1333                | 92                   | 150                    | 0.018                              | 3    |
| Cu- TiO <sub>2</sub> sphere               | Rayonet RPR-100 Photoreactor | paracetamol       | 50                             | 4                     | 98.8                 | 180                    | 0.0243                             | 4    |
| Cu-TiO <sub>2</sub> nanoparticles         | Xenon lamp 500 W             | nitrobenzene      | 6.15                           | 0.5                   | 98.6                 | 180                    | 0.0156                             | 5    |
| Cu-TiO <sub>2</sub> core shell nanowires  | mercury lamp 50W             | methyl orange     | 10                             |                       | 90                   | 80                     | 0.02905                            | 6    |

---

|                                        |                     |                   |    |      |    |     |        |              |
|----------------------------------------|---------------------|-------------------|----|------|----|-----|--------|--------------|
| Cu-TiO <sub>2</sub><br>nanotube arrays | Xenon lamp<br>200 W | methylene<br>blue | 2  |      | 92 | 120 | 0.0206 | <sup>7</sup> |
| Cu-TiO <sub>2</sub><br>nanotubes       | Xenon lamp<br>300 W | Rhodamine B       | 50 | 0.25 | 90 | 60  | 0.0329 | This<br>work |

---

60

61 **Reference**

- 62 1. T. Raguram and K. S. Rajni, *International Journal of Hydrogen Energy*, 2022, **47**, 4674-  
63 4689.
- 64 2. H. Lee, H. S. Jang, N. Y. Kim and J. B. Joo, *Journal of Industrial and Engineering Chemistry*,  
65 2021, **99**, 352-363.
- 66 3. M.-C. Wu, P.-Y. Wu, T.-H. Lin and T.-F. Lin, *Applied Surface Science*, 2018, **430**, 390-398.
- 67 4. C.-J. Lin and W.-T. Yang, *Chemical Engineering Journal*, 2014, **237**, 131-137.
- 68 5. T. Akhtar, H. Nasir, E. Sitara, S. A. B. Bukhari, S. Ullah and R. M. A. Iqbal, *Environmental*  
69 *Science and Pollution Research*, 2022, **29**, 49925-49936.
- 70 6. B. Babu, K. Mallikarjuna, C. V. Reddy and J. Park, *Materials Letters*, 2016, **176**, 265-269.
- 71 7. M. M. Momeni, Y. Ghayeb and Z. Ghonchehi, *Ceramics International*, 2015, **41**, 8735-8741.

72
