# Supplementary figures and images for: Enhanced photocatalytic performance of anatase titania nanotubes via the synergistic effect of trace copper doping and oxygen vacancies
Source: Royal Society of Chemistry journal article supplement (doi:10.1039/d3nj00848g), 2023-01-01

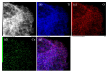

Supplement: d3nj00848g2.pdf [file d3nj00848g2.pdf]

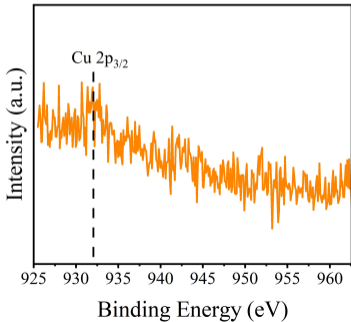

Supplement: d3nj00848g3.pdf [file d3nj00848g3.pdf]

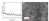

Supplement: d3nj00848g4.pdf [file d3nj00848g4.pdf]
